# Supplementary material for: Amifostine (WR-2721) Mitigates Cognitive Injury Induced by Heavy Ion Radiation in Male Mice and Alters Behavior and Brain Connectivity
Source: Front Physiol. 2021 Nov 16;12:770502. doi: 10.3389/fphys.2021.770502 (PMC8637850; doi:10.3389/fphys.2021.770502)
Supplement: Supplementary file 2 [file Data_Sheet_2.xlsx]

## Sheet: Master
SID	treatment	dose	sex	grey	CB	CH	BS	CBN	CBX	CNU	CTX	HB	IB	MB	CTXpl	CTXsp	DN	FN	HEM	HY	IP	MBmot	MBsen	MBsta	MY	P	PAL	STR	TH	VERM	AN	AT	BLA	BMA	CENT	CLA	COPY	CUL	CUN	DEC	DORpm	DORsm	EP	EW	FL	FOTU	HPF	IC	Isocortex
25	107	RAD	M	148967	6165	71519	60533	159	4877	16956	54563	19155	20001	21377	51518	2710	35	60	1781	9620	64	11535	4551	1751	4643	14512	4385	12571	10381	3096	512	14	791	559	1364	208	109	1177	125	61	7078	2228	693	39	266	0	24311	2825	23044
26	107	RAD	M	194041	8055	87510	83504	136	6607	17766	69744	16423	32255	34826	64375	4806	43	25	2611	11515	68	21850	5224	2408	3210	13213	3974	13792	20740	3996	538	7	1419	972	2191	335	46	1542	141	49	12551	5449	1197	39	683	0	31532	2992	27963
28	107	RAD	M	129802	9520	55976	56018	208	7993	7907	48069	14272	18023	23723	45247	2540	38	65	2331	7443	105	13113	3963	1804	3959	10313	1375	6532	10580	5662	816	14	746	301	2119	125	128	2067	170	336	7598	1695	711	67	374	34	22469	2150	19727
29	107	RAD	M	207899	12408	104882	79005	329	9291	16714	88168	21324	26729	30952	83324	4289	66	117	2453	11752	146	18805	4068	2776	5133	16191	2281	14433	14977	6838	604	21	1185	801	3546	409	132	2804	239	93	10883	2356	1241	121	287	0	50969	2225	26521
30	107	RAD	M	127293	9032	52943	58155	305	6743	8250	44693	14971	18840	24344	41682	2738	33	156	2729	6993	116	15220	3250	1957	3888	11083	1158	7092	11847	4014	1127	8	917	358	2327	158	135	1244	163	88	8375	2177	623	52	239	0	22873	1688	16556
31	107	RAD	M	127442	7456	50003	60804	181	5955	9317	40686	18570	17924	24310	36900	3375	40	84	1976	6851	57	15110	2228	2441	5025	13545	1229	8088	11073	3979	545	11	1015	683	1845	107	116	1611	142	70	7580	2154	717	53	264	14	23440	1254	10241
32	107	RAD	M	120926	5107	48317	59574	135	4227	8246	40071	18884	20360	20330	37222	2570	15	66	1584	9275	54	12577	2308	1664	3899	14985	1624	6622	11085	2643	692	6	811	234	1269	243	45	1041	147	37	7897	1967	793	25	161	0	16556	1506	17394
37	0	RAD	M	152400	7675	59695	75476	251	6156	9739	49956	23917	20696	30863	46260	3348	40	118	2316	8851	93	18725	4483	2853	5493	18424	1606	8133	11845	3840	670	9	1086	362	1664	185	165	1319	128	139	8839	1533	956	114	284	6	23507	2196	19744
38	0	RAD	M	169620	10511	72049	78427	347	8069	10735	61314	27033	22502	28892	57575	3329	132	114	2496	9986	101	17226	4269	2718	6811	20222	1867	8868	12516	5573	529	13	883	398	2606	322	148	2025	192	297	9188	1918	1029	76	477	23	25512	2247	29127
39	0	RAD	M	204353	12358	95386	87239	271	10469	9954	85432	27442	22482	37315	81565	3440	69	60	3737	9563	142	23669	5841	2686	6174	21268	1234	8720	12919	6732	1326	2	1034	557	2673	196	210	2741	180	421	8609	2593	826	69	506	20	36778	2954	41586
40	0	RAD	M	65272	5830	26410	28847	201	4725	3217	23193	8417	5786	14644	21369	1619	114	13	1508	3134	74	9464	1458	1312	2504	5913	332	2885	2652	3217	368	3	494	257	1397	84	93	1206	75	74	1599	729	375	25	243	0	14708	894	5646
45	0	RAD	M	147342	5179	68307	63792	150	4382	10387	57920	15264	22805	25723	54851	2762	46	41	1631	10607	63	16422	2942	2093	2368	12896	2004	8383	12198	2751	674	10	875	423	1354	278	47	1214	116	69	6831	3859	675	48	217	0	26076	1142	26335
46	0	RAD	M	160649	3724	78671	67423	62	3119	15448	63223	14276	27114	26033	58951	3795	13	27	838	14239	22	16672	2721	2271	1902	12374	4005	11443	12875	2281	161	0	1049	746	1198	295	11	879	131	44	9355	2034	1028	60	181	0	26480	1084	27171
47	0	RAD	M	70032	3317	35385	27097	98	2645	5596	29789	6802	8226	12069	28617	1047	22	21	880	3568	55	7157	2076	917	1758	5044	773	4823	4658	1765	218	5	217	139	931	128	28	678	67	37	3506	520	323	31	116	0	13243	1207	14295
48	0	RAD	M	53199	5141	20898	22629	72	4443	4597	16301	8084	8253	6292	15017	1133	20	27	1613	5520	25	2932	1168	785	2390	5694	824	3773	2733	2830	621	2	345	200	855	52	87	1301	108	256	1848	614	334	4	151	20	8023	780	5776
73	107	SHAM	M	134527	9108	58827	60481	201	7627	7701	51126	19377	16770	24334	47823	2918	38	63	3014	6465	100	14769	3575	1839	4791	14586	1202	6499	10305	4613	1186	8	982	406	1771	125	151	1776	132	234	7214	1849	779	99	403	6	24175	1967	20858
74	107	SHAM	M	67067	7151	28760	26517	177	5989	5850	22910	12669	4904	8944	21202	1536	33	54	1993	2291	90	4864	1145	935	4099	8570	692	5158	2613	3996	787	1	439	205	1865	64	139	1201	82	76	1636	533	364	0	131	0	13142	713	6972
76	107	SHAM	M	135159	7610	58448	59828	172	6217	9943	48505	19375	15685	24768	44940	3184	58	60	2078	7924	54	13862	3869	2501	3739	15636	1173	8770	7761	4139	620	9	845	628	2173	281	99	1461	142	89	4678	2135	757	36	267	6	24563	2063	17575
77	107	SHAM	M	123885	7691	45050	64875	160	6240	6542	38508	20116	15740	29019	36031	2207	41	69	961	8175	50	17000	4174	2908	4842	15274	944	5598	7565	5279	224	7	599	465	2627	140	53	1725	210	251	5227	1441	419	66	158	1	19889	2651	14662
78	107	SHAM	M	154657	10704	52026	84754	172	9303	7400	44626	28868	20251	35635	41562	2727	38	51	2263	9968	83	21878	4406	3176	6808	22060	1130	6270	10283	7040	583	2	907	488	2631	135	229	2673	339	408	5978	2925	632	80	371	33	24340	2665	14158
79	107	SHAM	M	144317	6403	59051	71457	106	5418	8194	50857	21464	19667	30326	47993	2532	27	34	1431	8968	45	18617	3556	3104	4340	17124	1281	6913	10699	3987	473	7	839	392	2046	205	63	1509	174	84	8208	1360	563	49	193	0	26955	1849	17933
80	107	SHAM	M	117423	8741	43370	57677	137	7227	7112	36258	18956	15153	23568	33835	2141	28	42	2003	8109	67	14463	2433	2661	5527	13429	1205	5907	7044	5224	835	12	567	392	1906	144	90	2055	220	352	5067	1113	556	13	289	24	19614	1250	12288
85	0	SHAM	M	121054	7078	60449	45196	148	5862	9617	50832	11708	14657	18831	47265	3213	36	53	2366	4518	59	10812	3345	1581	2684	9024	1013	8604	10139	3496	1214	2	926	417	1500	216	87	1314	110	115	7561	1402	888	32	290	5	20979	2141	23644
86	0	SHAM	M	131384	7660	58851	56308	183	6187	9708	49143	16818	19226	20264	45385	3394	42	64	2108	8841	77	11504	2692	2225	4655	12163	1569	8139	10385	4079	657	11	917	430	1523	212	92	1472	261	316	7407	1742	1031	45	288	19	23259	1082	19069
87	0	SHAM	M	128605	10037	54654	55953	267	8045	6600	48054	18341	14076	23536	45513	2285	45	121	2908	8269	101	13172	3955	2295	5850	12491	1044	5556	5807	5137	982	3	666	442	2387	114	215	1858	139	219	3652	1517	633	44	254	11	23623	2099	19573
88	0	SHAM	M	167395	6203	71911	67877	324	4728	20897	51014	18140	24847	24890	47097	3555	55	138	1907	10060	131	15075	3290	2005	4294	13846	2570	18327	14787	2821	621	10	1164	721	1603	155	119	934	171	43	10437	2673	730	47	242	0	26376	1694	16582
93	0	SHAM	M	128850	6965	58909	53804	192	5733	13146	45763	12672	19741	21391	42605	2828	25	70	1879	8658	97	13149	2413	1964	3336	9336	2516	10630	11083	3854	665	3	680	627	1865	202	92	1243	126	172	7930	1739	724	50	275	0	24404	1513	14436
94	0	SHAM	M	140617	5348	63946	59254	107	4593	14723	49223	15747	23003	20504	45871	2986	17	47	1569	9369	43	12231	2138	1967	3011	12736	2528	12195	13634	3024	536	7	794	387	1150	270	64	1473	118	172	10012	1976	839	22	294	0	25067	1024	15471
95	0	SHAM	M	127706	7062	52857	57398	194	5602	12303	40554	15910	18385	23103	36906	3200	70	64	1662	9020	60	14720	2014	2011	4440	11470	3382	8921	9365	3940	326	8	928	536	2076	167	75	1320	109	91	5725	2499	836	35	473	2	22145	1012	11369
96	0	SHAM	M	108784	4979	48130	47342	96	3993	9517	38613	14016	13208	20118	35929	2339	37	39	1165	5619	20	12662	1973	1862	3327	10689	1611	7906	7589	2828	261	2	701	464	1301	146	54	1190	141	81	5187	1383	593	18	284	1	20233	1092	13030
Full Name				EVERYTHING (including CB & CH)	Cerebellum	Cerebrum	Brainstem	Cerebellar Nuclei	Cerebellar Cortex	Cerebral Nuclei	Cerebral Cortex	Hindbrain	Interbrain	Midbrain	cortical plate	cortical subplate	dentate nucleus	fastigial nucleus	Hemispheric region	hypothalamus	interposed nucleus	midbrain, motor part	Midbrain, sensory part	Midbrain, behavioral state part	Medulla	pons (summed p-mot, p-sat, and p-sen)	Pallidum	Striatum	thalamus	Cermal Region	ansiform lobule	anterior tegmental nucleus	basolateral amygdalar nucleus	basomedial amygdalar nucleus	central lobule	claustrum	copula pyramidis	culmen	cuneiform nucleus	Declive (VI)	Thalamus, polymodal association cortex related	thalamus, sensory-motor cortex related	endopiriform nucleus	edinger-westphal nucleus	Flocculus	Folium-tuber vermis (VII)	hippocampal formation	inferior colliculus	isocortex
Level				0	1	1	1	2	2	2	2	2	2	2	3	3	3	3	3	3	3	3	3	3	3	3	3	3	3	3	4	4	4	4	4	4	4	4	4	4	4	4	4	4	4	4	4	4	4
Family(level1)				EVERYTHING (including CB & CH)	Cerebellum	Cerebrum	Brainstem	Cerebellum	Cerebellum	Cerebrum	Cerebrum	Brainstem	Brainstem	Brainstem	Cerebrum	Cerebrum	Cerebellum	Cerebellum	Cerebellum	Brainstem	Cerebellum	Brainstem	Brainstem	Brainstem	Brainstem	Brainstem	Cerebrum	Cerebrum	Brainstem	Cerebellum	Cerebellum	Brainstem	Cerebrum	Cerebrum	Cerebellum	Cerebrum	Cerebellum	Cerebellum	Brainstem	Cerebellum	Brainstem	Brainstem	Cerebrum	Brainstem	Cerebellum	Cerebellum	Cerebrum	Brainstem	Cerebrum
[truncated: 835 more columns]

## Sheet: Level1
SID	treatment	dose	sex	grey	CB	CH	BS
25	107	RAD	M	148967	6165	71519	60533
26	107	RAD	M	194041	8055	87510	83504
28	107	RAD	M	129802	9520	55976	56018
29	107	RAD	M	207899	12408	104882	79005
30	107	RAD	M	127293	9032	52943	58155
31	107	RAD	M	127442	7456	50003	60804
32	107	RAD	M	120926	5107	48317	59574
37	0	RAD	M	152400	7675	59695	75476
38	0	RAD	M	169620	10511	72049	78427
39	0	RAD	M	204353	12358	95386	87239
40	0	RAD	M	65272	5830	26410	28847
45	0	RAD	M	147342	5179	68307	63792
46	0	RAD	M	160649	3724	78671	67423
47	0	RAD	M	70032	3317	35385	27097
48	0	RAD	M	53199	5141	20898	22629
73	107	SHAM	M	134527	9108	58827	60481
74	107	SHAM	M	67067	7151	28760	26517
76	107	SHAM	M	135159	7610	58448	59828
77	107	SHAM	M	123885	7691	45050	64875
78	107	SHAM	M	154657	10704	52026	84754
79	107	SHAM	M	144317	6403	59051	71457
80	107	SHAM	M	117423	8741	43370	57677
85	0	SHAM	M	121054	7078	60449	45196
86	0	SHAM	M	131384	7660	58851	56308
87	0	SHAM	M	128605	10037	54654	55953
88	0	SHAM	M	167395	6203	71911	67877
93	0	SHAM	M	128850	6965	58909	53804
94	0	SHAM	M	140617	5348	63946	59254
95	0	SHAM	M	127706	7062	52857	57398
96	0	SHAM	M	108784	4979	48130	47342
Full Name				EVERYTHING (including CB & CH)	Cerebellum	Cerebrum	Brainstem
Level				0	1	1	1
Family(level1)				EVERYTHING (including CB & CH)	Cerebellum	Cerebrum	Brainstem

## Sheet: Level2
SID	treatment	dose	sex	CBN	CBX	CNU	CTX	HB	IB	MB
25	107	RAD	M	159	4877	16956	54563	19155	20001	21377
26	107	RAD	M	136	6607	17766	69744	16423	32255	34826
28	107	RAD	M	208	7993	7907	48069	14272	18023	23723
29	107	RAD	M	329	9291	16714	88168	21324	26729	30952
30	107	RAD	M	305	6743	8250	44693	14971	18840	24344
31	107	RAD	M	181	5955	9317	40686	18570	17924	24310
32	107	RAD	M	135	4227	8246	40071	18884	20360	20330
37	0	RAD	M	251	6156	9739	49956	23917	20696	30863
38	0	RAD	M	347	8069	10735	61314	27033	22502	28892
39	0	RAD	M	271	10469	9954	85432	27442	22482	37315
40	0	RAD	M	201	4725	3217	23193	8417	5786	14644
45	0	RAD	M	150	4382	10387	57920	15264	22805	25723
46	0	RAD	M	62	3119	15448	63223	14276	27114	26033
47	0	RAD	M	98	2645	5596	29789	6802	8226	12069
48	0	RAD	M	72	4443	4597	16301	8084	8253	6292
73	107	SHAM	M	201	7627	7701	51126	19377	16770	24334
74	107	SHAM	M	177	5989	5850	22910	12669	4904	8944
76	107	SHAM	M	172	6217	9943	48505	19375	15685	24768
77	107	SHAM	M	160	6240	6542	38508	20116	15740	29019
78	107	SHAM	M	172	9303	7400	44626	28868	20251	35635
79	107	SHAM	M	106	5418	8194	50857	21464	19667	30326
80	107	SHAM	M	137	7227	7112	36258	18956	15153	23568
85	0	SHAM	M	148	5862	9617	50832	11708	14657	18831
86	0	SHAM	M	183	6187	9708	49143	16818	19226	20264
87	0	SHAM	M	267	8045	6600	48054	18341	14076	23536
88	0	SHAM	M	324	4728	20897	51014	18140	24847	24890
93	0	SHAM	M	192	5733	13146	45763	12672	19741	21391
94	0	SHAM	M	107	4593	14723	49223	15747	23003	20504
95	0	SHAM	M	194	5602	12303	40554	15910	18385	23103
96	0	SHAM	M	96	3993	9517	38613	14016	13208	20118
Full Name				Cerebellar Nuclei	Cerebellar Cortex	Cerebral Nuclei	Cerebral Cortex	Hindbrain	Interbrain	Midbrain
Level				2	2	2	2	2	2	2
Family(level1)				Cerebellum	Cerebellum	Cerebrum	Cerebrum	Brainstem	Brainstem	Brainstem

## Sheet: Level3
SID	treatment	dose	sex	CTXpl	CTXsp	DN	FN	HEM	HY	IP	MBmot	MBsen	MBsta	MY	P	PAL	STR	TH	VERM
25	107	RAD	M	51518	2710	35	60	1781	9620	64	11535	4551	1751	4643	14512	4385	12571	10381	3096
26	107	RAD	M	64375	4806	43	25	2611	11515	68	21850	5224	2408	3210	13213	3974	13792	20740	3996
28	107	RAD	M	45247	2540	38	65	2331	7443	105	13113	3963	1804	3959	10313	1375	6532	10580	5662
29	107	RAD	M	83324	4289	66	117	2453	11752	146	18805	4068	2776	5133	16191	2281	14433	14977	6838
30	107	RAD	M	41682	2738	33	156	2729	6993	116	15220	3250	1957	3888	11083	1158	7092	11847	4014
31	107	RAD	M	36900	3375	40	84	1976	6851	57	15110	2228	2441	5025	13545	1229	8088	11073	3979
32	107	RAD	M	37222	2570	15	66	1584	9275	54	12577	2308	1664	3899	14985	1624	6622	11085	2643
37	0	RAD	M	46260	3348	40	118	2316	8851	93	18725	4483	2853	5493	18424	1606	8133	11845	3840
38	0	RAD	M	57575	3329	132	114	2496	9986	101	17226	4269	2718	6811	20222	1867	8868	12516	5573
39	0	RAD	M	81565	3440	69	60	3737	9563	142	23669	5841	2686	6174	21268	1234	8720	12919	6732
40	0	RAD	M	21369	1619	114	13	1508	3134	74	9464	1458	1312	2504	5913	332	2885	2652	3217
45	0	RAD	M	54851	2762	46	41	1631	10607	63	16422	2942	2093	2368	12896	2004	8383	12198	2751
46	0	RAD	M	58951	3795	13	27	838	14239	22	16672	2721	2271	1902	12374	4005	11443	12875	2281
47	0	RAD	M	28617	1047	22	21	880	3568	55	7157	2076	917	1758	5044	773	4823	4658	1765
48	0	RAD	M	15017	1133	20	27	1613	5520	25	2932	1168	785	2390	5694	824	3773	2733	2830
73	107	SHAM	M	47823	2918	38	63	3014	6465	100	14769	3575	1839	4791	14586	1202	6499	10305	4613
74	107	SHAM	M	21202	1536	33	54	1993	2291	90	4864	1145	935	4099	8570	692	5158	2613	3996
76	107	SHAM	M	44940	3184	58	60	2078	7924	54	13862	3869	2501	3739	15636	1173	8770	7761	4139
77	107	SHAM	M	36031	2207	41	69	961	8175	50	17000	4174	2908	4842	15274	944	5598	7565	5279
78	107	SHAM	M	41562	2727	38	51	2263	9968	83	21878	4406	3176	6808	22060	1130	6270	10283	7040
79	107	SHAM	M	47993	2532	27	34	1431	8968	45	18617	3556	3104	4340	17124	1281	6913	10699	3987
80	107	SHAM	M	33835	2141	28	42	2003	8109	67	14463	2433	2661	5527	13429	1205	5907	7044	5224
85	0	SHAM	M	47265	3213	36	53	2366	4518	59	10812	3345	1581	2684	9024	1013	8604	10139	3496
86	0	SHAM	M	45385	3394	42	64	2108	8841	77	11504	2692	2225	4655	12163	1569	8139	10385	4079
87	0	SHAM	M	45513	2285	45	121	2908	8269	101	13172	3955	2295	5850	12491	1044	5556	5807	5137
88	0	SHAM	M	47097	3555	55	138	1907	10060	131	15075	3290	2005	4294	13846	2570	18327	14787	2821
93	0	SHAM	M	42605	2828	25	70	1879	8658	97	13149	2413	1964	3336	9336	2516	10630	11083	3854
94	0	SHAM	M	45871	2986	17	47	1569	9369	43	12231	2138	1967	3011	12736	2528	12195	13634	3024
95	0	SHAM	M	36906	3200	70	64	1662	9020	60	14720	2014	2011	4440	11470	3382	8921	9365	3940
96	0	SHAM	M	35929	2339	37	39	1165	5619	20	12662	1973	1862	3327	10689	1611	7906	7589	2828
Full Name				cortical plate	cortical subplate	dentate nucleus	fastigial nucleus	Hemispheric region	hypothalamus	interposed nucleus	midbrain, motor part	Midbrain, sensory part	Midbrain, behavioral state part	Medulla	pons (summed p-mot, p-sat, and p-sen)	Pallidum	Striatum	thalamus	Cermal Region
Level				3	3	3	3	3	3	3	3	3	3	3	3	3	3	3	3
Family(level1)				Cerebrum	Cerebrum	Cerebellum	Cerebellum	Cerebellum	Brainstem	Cerebellum	Brainstem	Brainstem	Brainstem	Brainstem	Brainstem	Cerebrum	Cerebrum	Brainstem	Cerebellum

## Sheet: Level4
SID	treatment	dose	sex	AN	AT	BLA	BMA	CENT	CLA	COPY	CUL	CUN	DEC	DORpm	DORsm	EP	EW	FL	FOTU	HPF	IC	Isocortex	LA	LING	LSX	LT	LZ	MEV	MEZ	MRN	MY-mot	MY-sat	MY-sen	NB	NOD	OLF	P-mot	P-sat	P-sen	PA	PAG	PALc	PALd	PALm	PALv	PBG	PFL	PPN	PRM
25	107	RAD	M	512	14	791	559	1364	208	109	1177	125	61	7078	2228	693	39	266	0	24311	2825	23044	283	41	550	12	5359	53	2112	2331	2691	224	645	133	355	4163	4714	3832	1605	176	2170	391	1562	273	2159	54	188	403	95
26	107	RAD	M	538	7	1419	972	2191	335	46	1542	141	49	12551	5449	1197	39	683	0	31532	2992	27963	685	55	747	9	6715	72	2698	2696	1615	46	641	131	99	4880	4284	3410	1701	198	8138	576	2065	187	1146	49	560	472	22
28	107	RAD	M	816	14	746	301	2119	125	128	2067	170	336	7598	1695	711	67	374	34	22469	2150	19727	536	59	590	7	2854	71	2352	2589	1910	63	989	103	450	3051	2741	2740	1565	121	2961	471	166	325	413	29	291	391	125
29	107	RAD	M	604	21	1185	801	3546	409	132	2804	239	93	10883	2356	1241	121	287	0	50969	2225	26521	409	27	1070	12	5837	138	3580	3162	3010	153	616	120	222	5834	5288	4369	2152	244	5251	535	602	287	857	82	322	497	102
30	107	RAD	M	1127	8	917	358	2327	158	135	1244	163	88	8375	2177	623	52	239	0	22873	1688	16556	546	65	631	8	3234	109	2155	2779	2151	29	798	125	254	2253	3115	3375	1499	136	4499	402	179	151	426	35	249	427	144
31	107	RAD	M	545	11	1015	683	1845	107	116	1611	142	70	7580	2154	717	53	264	14	23440	1254	10241	507	18	547	4	3393	115	1733	3117	2981	315	576	186	161	3219	4701	3522	1659	346	2956	271	330	199	429	62	312	442	77
32	107	RAD	M	692	6	811	234	1269	243	45	1041	147	37	7897	1967	793	25	161	0	16556	1506	17394	344	11	690	5	3981	93	2426	2448	2436	110	613	83	191	3272	5478	4185	1645	145	3630	447	245	263	669	42	146	364	56
37	0	RAD	M	670	9	1086	362	1664	185	165	1319	128	139	8839	1533	956	114	284	6	23507	2196	19744	586	68	700	11	4844	65	2448	3136	3447	105	895	113	402	3009	6469	5071	2397	173	4511	527	221	251	607	27	277	685	174
38	0	RAD	M	529	13	883	398	2606	322	148	2025	192	297	9188	1918	1029	76	477	23	25512	2247	29127	582	15	449	8	5016	115	2456	2640	4348	233	851	137	253	2936	6893	4765	3232	115	4688	407	377	156	927	41	536	626	61
39	0	RAD	M	1326	2	1034	557	2673	196	210	2741	180	421	8609	2593	826	69	506	20	36778	2954	41586	652	22	509	15	5608	138	2475	4723	3635	59	1286	156	357	3201	7321	4880	2997	175	6210	331	351	156	396	67	383	588	183
40	0	RAD	M	368	3	494	257	1397	84	93	1206	75	74	1599	729	375	25	243	0	14708	894	5646	285	10	113	7	1525	58	1026	2044	1644	27	335	113	267	1015	1729	1728	941	124	2429	44	116	29	143	70	295	115	58
45	0	RAD	M	674	10	875	423	1354	278	47	1214	116	69	6831	3859	675	48	217	0	26076	1142	26335	419	9	312	8	6008	123	2483	3601	1425	124	222	192	82	2440	4449	3130	1347	92	5629	435	394	115	1060	42	238	271	38
46	0	RAD	M	161	0	1049	746	1198	295	11	879	131	44	9355	2034	1028	60	181	0	26480	1084	27171	588	17	839	7	9503	94	2556	3009	1007	119	231	144	92	5300	4572	2859	1217	89	3569	451	562	264	2728	37	188	279	8
47	0	RAD	M	218	5	217	139	931	128	28	678	67	37	3506	520	323	31	116	0	13243	1207	14295	205	2	363	1	1549	46	1186	903	1033	82	425	59	87	1079	1803	842	818	35	1954	174	89	214	296	16	114	136	32
48	0	RAD	M	621	2	345	200	855	52	87	1301	108	256	1848	614	334	4	151	20	8023	780	5776	165	7	139	6	2984	24	998	609	1343	35	391	4	141	1218	1782	1825	563	37	594	251	173	108	292	8	200	103	161
73	107	SHAM	M	1186	8	982	406	1771	125	151	1776	132	234	7214	1849	779	99	403	6	24175	1967	20858	487	12	532	6	3695	63	1454	2284	2796	55	920	101	326	2790	5460	3269	1922	139	4378	242	252	218	490	50	280	362	151
74	107	SHAM	M	787	1	439	205	1865	64	139	1201	82	76	1636	533	364	0	131	0	13142	713	6972	397	49	205	4	1481	63	346	868	2879	137	259	31	221	1088	3095	2267	953	67	729	182	143	41	326	17	158	212	172
76	107	SHAM	M	620	9	845	628	2173	281	99	1461	142	89	4678	2135	757	36	267	6	24563	2063	17575	491	18	264	13	4053	156	1997	2983	2108	77	631	196	168	2802	4757	4274	2252	182	2740	260	329	75	509	75	343	579	103
77	107	SHAM	M	224	7	599	465	2627	140	53	1725	210	251	5227	1441	419	66	158	1	19889	2651	14662	429	28	261	11	3639	135	2698	2812	2489	278	731	142	180	1480	4463	3873	2471	155	4359	158	199	156	431	56	106	536	60
78	107	SHAM	M	583	2	907	488	2631	135	229	2673	339	408	5978	2925	632	80	371	33	24340	2665	14158	411	30	168	8	6667	79	2118	4810	3840	218	1312	163	527	3064	7395	6344	2787	154	4475	77	248	160	645	29	355	734	198
79	107	SHAM	M	473	7	839	392	2046	205	63	1509	174	84	8208	1360	563	49	193	0	26955	1849	17933	415	14	685	4	4134	101	2877	3026	2401	75	882	142	235	3105	5326	4514	2214	118	4154	306	292	173	510	48	158	543	55
80	107	SHAM	M	835	12	567	392	1906	144	90	2055	220	352	5067	1113	556	13	289	24	19614	1250	12288	378	19	390	9	4196	75	1734	2204	2930	220	777	119	212	1933	3525	4064	1911	104	4486	267	190	110	638	45	296	687	69
85	0	SHAM	M	1214	2	926	417	1500	216	87	1314	110	115	7561	1402	888	32	290	5	20979	2141	23644	666	35	655	4	2175	44	1517	1680	1185	36	767	123	271	2642	2405	2589	1338	100	2974	154	371	113	375	33	187	401	164
86	0	SHAM	M	657	11	917	430	1523	212	92	1472	261	316	7407	1742	1031	45	288	19	23259	1082	19069	658	62	825	4	3818	104	2788	2471	3079	160	595	89	361	3057	4072	3016	1550	146	2532	583	195	361	430	52	229	689	125
87	0	SHAM	M	982	3	666	442	2387	114	215	1858	139	219	3652	1517	633	44	254	11	23623	2099	19573	371	15	385	6	4209	61	2561	3232	3570	95	925	146	369	2317	4175	3113	1801	59	2228	212	161	241	430	41	181	621	210
88	0	SHAM	M	621	10	1164	721	1603	155	119	934	171	43	10437	2673	730	47	242	0	26376	1694	16582	632	19	1504	5	5058	108	2689	2873	2808	78	541	94	99	4139	4721	4148	1489	153	3755	591	632	437	910	29	273	432	63
93	0	SHAM	M	665	3	680	627	1865	202	92	1243	126	172	7930	1739	724	50	275	0	24404	1513	14436	472	12	755	6	4532	95	2216	2419	1887	85	420	118	295	3765	2791	3105	1102	123	3130	434	476	364	1242	33	272	358	110
94	0	SHAM	M	536	7	794	387	1150	270	64	1473	118	172	10012	1976	839	22	294	0	25067	1024	15471	491	6	1063	58	3828	83	2300	1665	1612	108	623	81	136	5333	4099	4012	1195	205	3054	557	459	438	1074	30	273	387	24
95	0	SHAM	M	326	8	928	536	2076	167	75	1320	109	91	5725	2499	836	35	473	2	22145	1012	11369	496	6	469	7	5229	81	2025	2038	2080	242	763	145	206	3392	2757	3450	1777	237	5142	518	941	102	1821	69	266	293	101
96	0	SHAM	M	261	2	701	464	1301	146	54	1190	141	81	5187	1383	593	18	284	1	20233	1092	13030	302	5	409	2	2639	48	1619	1546	1722	276	427	106	123	2666	2890	3423	1112	133	4103	376	385	77	773	32	231	260	45
Full Name				ansiform lobule	anterior tegmental nucleus	basolateral amygdalar nucleus	basomedial amygdalar nucleus	central lobule	claustrum	copula pyramidis	culmen	cuneiform nucleus	Declive (VI)	Thalamus, polymodal association cortex related	thalamus, sensory-motor cortex related	endopiriform nucleus	edinger-westphal nucleus	Flocculus	Folium-tuber vermis (VII)	hippocampal formation	inferior colliculus	isocortex	lateral amygdalar nucleus	lingula (I)	lateral septal complex	lateral terminal nucleus of the accessory optic tract	Hypothalamic lateral zone	midbrain trigeminal nucleus	Hypothalamic Medial Zone	midbrain reticular nucleus	medulla, motor related	medulla, behavioral state related	medulla, sensory related	Nucleus of the brachium of the inferior colliculus	Nodulus (X)	olfactory areas	pons, motor related	pons, behavioral state related	pons, sensory related	posterior amygdalar nucleus	periaqueductal gray	pallidum, caudal region	pallidum, dorsal region	pallidum, medial region	pallidum, ventral region	parabigeminal nucleus	paraflocculus	pedunculopontine nucleus	paramedian lobule
Level				4	4	4	4	4	4	4	4	4	4	4	4	4	4	4	4	4	4	4	4	4	4	4	4	4	4	4	4	4	4	4	4	4	4	4	4	4	4	4	4	4	4	4	4	4	4
Family(level1)				Cerebellum	Brainstem	Cerebrum	Cerebrum	Cerebellum	Cerebrum	Cerebellum	Cerebellum	Brainstem	Cerebellum	Brainstem	Brainstem	Cerebrum	Brainstem	Cerebellum	Cerebellum	Cerebrum	Brainstem	Cerebrum	Cerebrum	Cerebellum	Cerebrum	Brainstem	Brainstem	Brainstem	Brainstem	Brainstem	Brainstem	Brainstem	Brainstem	Brainstem	Cerebellum	Cerebrum	Brainstem	Brainstem	Brainstem	Cerebrum	Brainstem	Cerebrum	Cerebrum	Cerebrum	Cerebrum	Brainstem	Cerebellum	Brainstem	Cerebellum
[truncated: 19 more columns]

## Sheet: Level5
SID	treatment	dose	sex	AAA	ACA	ACB	ACVII	ADP	AHN	AI	AMB	ANcr1	ANcr2	AOB	AON	AP	APN	ARH	ASO	ATN	AUD	AVP	AVPV	B	BA	BAC	BLAa	BLAp	BLAv	BMAa	BMAp	BST	CEA	CENT2	CENT3	CLI	CN	COA	COPYgr	COPYmo	CP	CS	CUL4, 5	DCN	DECgr	DECmo	DMH	DMX	DP
25	107	RAD	M	260	487	470	1	15	218	364	0	206	306	10	76	0	161	16	0	737	3776	2	0	17	25	6	489	192	110	105	454	385	1852	631	733	118	287	457	69	40	6241	560	1177	6	31	30	254	1	49
26	107	RAD	M	172	422	587	8	10	325	581	0	308	230	4	74	0	813	13	0	1518	4742	2	2	9	11	6	892	476	51	258	714	570	2781	1050	1141	120	520	531	14	32	7212	455	1542	0	11	38	336	0	31
28	107	RAD	M	115	360	187	0	11	150	192	7	349	467	2	12	12	273	114	0	1363	2285	30	7	20	21	3	499	222	25	70	231	468	386	892	1227	344	548	341	73	55	3656	448	2067	17	182	154	324	11	11
29	107	RAD	M	241	425	698	3	25	667	614	0	265	339	8	80	0	557	12	0	2005	4274	1	10	38	39	5	741	365	79	239	562	530	919	1510	2036	171	432	548	103	29	8002	518	2804	6	29	64	514	3	20
30	107	RAD	M	84	328	358	5	10	279	229	10	504	623	0	31	4	398	21	0	1708	2151	3	11	58	6	4	583	300	34	82	276	398	604	1318	1009	175	456	238	81	54	3818	503	1244	6	40	48	270	12	12
31	107	RAD	M	74	129	419	3	11	157	181	1	265	280	3	17	1	361	26	0	749	1327	9	7	44	25	0	566	388	61	70	613	271	913	959	886	113	395	851	62	54	3481	344	1611	4	34	36	308	3	11
32	107	RAD	M	82	504	180	6	9	334	290	0	386	306	0	50	1	275	58	0	1422	2792	5	4	47	8	2	621	169	21	63	171	445	520	652	617	103	390	240	23	22	3351	464	1041	14	29	8	572	4	11
37	0	RAD	M	89	326	215	16	5	219	242	8	295	375	0	20	2	665	5	0	1395	3934	3	3	25	6	2	748	282	56	63	299	525	621	677	987	184	531	345	77	88	4319	888	1319	10	77	62	229	3	2
38	0	RAD	M	106	283	246	5	6	293	593	8	252	277	1	6	6	547	26	0	1403	5095	0	0	66	30	0	521	286	76	90	308	407	849	1166	1440	169	538	333	86	62	4568	847	2025	18	114	183	577	14	4
39	0	RAD	M	79	248	340	14	1	225	193	22	730	596	1	16	11	623	3	0	1309	5573	0	0	30	24	11	497	415	122	101	456	320	585	1027	1646	213	692	507	134	76	4563	906	2741	35	173	248	415	3	5
40	0	RAD	M	28	80	17	0	0	37	85	3	256	112	0	0	7	251	10	0	159	1147	0	0	8	2	0	260	191	43	22	235	44	378	482	915	62	83	230	44	49	1199	121	1206	20	34	40	73	8	0
45	0	RAD	M	128	485	244	4	8	199	298	0	340	334	0	10	0	397	23	0	930	3103	2	0	35	32	29	595	217	63	71	352	406	825	552	802	113	107	286	20	27	4670	523	1214	2	26	43	249	1	6
46	0	RAD	M	186	476	758	1	5	268	511	0	76	85	7	63	0	836	8	0	1466	4208	1	3	38	50	2	634	310	105	185	561	449	957	586	612	198	197	542	7	4	5618	430	879	0	19	25	382	0	39
47	0	RAD	M	83	237	189	1	2	55	188	3	126	92	0	18	0	245	44	0	401	1448	1	1	21	3	0	154	51	12	26	113	174	211	534	397	59	313	195	18	10	3350	146	678	0	15	22	60	0	12
48	0	RAD	M	39	308	164	5	16	116	93	0	358	263	0	5	1	62	11	0	89	717	3	7	4	4	4	233	89	23	73	127	247	184	256	599	60	271	141	44	43	2425	385	1301	6	90	166	169	0	6
73	107	SHAM	M	55	235	184	6	0	116	301	7	603	583	1	53	7	435	48	0	1045	2635	10	1	7	25	1	589	338	55	92	314	241	636	536	1235	248	537	400	101	50	2678	443	1776	19	113	121	188	8	6
74	107	SHAM	M	158	108	126	7	1	30	86	15	345	442	0	3	5	156	8	0	434	1049	0	0	20	41	3	244	167	28	57	148	179	436	870	995	34	100	322	99	40	2531	222	1201	9	55	21	60	30	1
76	107	SHAM	M	174	311	352	6	9	163	329	2	318	302	4	142	3	281	43	0	386	2176	7	12	74	9	1	514	263	68	147	481	259	687	1030	1143	204	373	472	36	63	4636	356	1461	5	51	38	300	3	7
77	107	SHAM	M	66	356	276	1	4	245	160	1	111	113	31	63	3	332	1	0	548	1961	0	1	52	7	0	347	201	51	115	350	158	597	1124	1503	210	505	289	35	18	2732	472	1725	15	138	113	415	2	13
78	107	SHAM	M	80	310	223	9	3	147	181	5	259	324	0	19	19	384	8	0	400	2108	0	2	9	30	0	576	282	49	151	337	77	829	764	1867	324	613	693	145	84	2179	949	2673	44	168	240	169	10	4
79	107	SHAM	M	188	240	275	5	13	288	217	3	211	262	0	19	4	597	33	0	1578	2095	1	1	60	18	3	542	217	80	81	311	303	370	933	1113	276	550	617	36	27	3301	811	1509	11	11	73	287	4	11
80	107	SHAM	M	98	187	282	2	4	190	148	6	334	501	0	83	0	377	42	0	867	1650	19	15	23	17	3	314	194	59	105	287	264	440	805	1101	85	536	260	46	44	2642	495	2055	19	131	221	115	2	11
85	0	SHAM	M	72	455	732	0	4	67	263	1	659	555	0	46	2	312	0	0	1319	3441	0	1	5	8	1	601	280	45	81	336	153	745	638	862	131	583	380	51	36	4602	403	1314	9	64	51	132	1	11
86	0	SHAM	M	162	538	297	2	26	284	332	26	361	296	0	28	4	147	1	0	1310	2198	4	18	18	30	1	634	223	60	108	322	582	446	769	754	129	427	364	47	45	4482	445	1472	9	144	172	406	1	13
87	0	SHAM	M	113	320	234	0	14	264	167	33	465	517	0	37	9	139	16	0	331	2743	6	1	36	37	0	498	144	24	111	331	212	301	1082	1305	169	541	272	122	93	2788	422	1858	19	113	106	278	8	27
88	0	SHAM	M	212	368	333	1	8	359	283	20	308	313	15	80	1	376	16	0	1904	1989	11	13	59	31	2	647	384	133	91	630	589	1751	943	660	111	378	457	71	48	12291	453	934	1	18	25	454	0	49
93	0	SHAM	M	164	158	431	1	10	374	215	1	316	349	0	31	1	421	11	0	1512	1766	4	9	23	23	2	484	171	25	227	400	432	2093	873	992	131	228	617	67	25	3852	363	1243	9	27	145	306	0	15
94	0	SHAM	M	331	496	432	6	21	287	326	0	287	249	0	106	0	266	31	0	1187	1998	17	10	27	116	4	567	164	63	64	323	553	1054	411	739	129	474	596	27	37	5936	534	1473	6	64	108	722	0	17
95	0	SHAM	M	117	529	438	1	5	162	220	0	151	175	0	24	2	328	48	1	700	1927	2	4	24	20	3	525	312	91	113	423	515	792	858	1218	461	526	655	41	34	4192	606	1320	13	45	46	160	2	15
96	0	SHAM	M	143	298	320	0	1	171	211	0	102	159	1	26	0	283	20	0	883	1711	1	3	15	47	2	465	179	57	107	357	374	1066	536	765	79	274	584	19	35	3701	381	1190	8	33	48	207	7	8
Full Name				anterior amygdalar area	anterior cingulate area	nucleus accumbens	accessory facial motor nucleus	anterodorsal preoptic nucleus	anterior hypothalamic nucleus	agranular insular area	nucleus ambiguus	Crus 1	Crus 2	accessory olfactory bulb	anterior olfactory nucleus	area postrema	anterior pretectal nucleus	arcuate hypothalamic nucleus	accessory supraoptic group	anterior group of the dorsal thalamus	auditory areas	anteroventral preoptic nucleus	anterventral periventricular nucleus	Barrington's nucleus	bed nucleus of the accessory olfactory tract	bed nucleus of the anterior commissure	basolateral amygdalar nucleus, anterior part	basolateral amygdalar nucleus, posterior part	Basolateral mygdalar nucles, ventral part	basomedial amygdalar nucleus, anterior part	basomedial amygdalar nucleus, posterior part	bed nucleus of the stria terminalis	central amygdalar nucleus	lobule II	lobule III	central linear nucleus raphe	cochlear nuclei	cortical amygdalar area	copula pyramidis, granular layer	copula pyramidis, molecular lyaer	caudoputamen	superior central nucleus raphe	lobules IV-V	dorsal column nuclei	declive, granular layer	Declive, molecular layer	dorsomedial nucleus of the hypothalamus	dorsal motor nucleus of the vagus nuerve	dorsal peduncular area
Level				5	5	5	5	5	5	5	5	5	5	5	5	5	5	5	5	5	5	5	5	5	5	5	5	5	5	5	5	5	5	5	5	5	5	5	5	5	5	5	5	5	5	5	5	5	5
Family(level1)				Cerebrum	Cerebrum	Cerebrum	Brainstem	Brainstem	Brainstem	Cerebrum	Brainstem	Cerebellum	Cerebellum	Cerebrum	Cerebrum	Brainstem	Brainstem	Brainstem	Brainstem	Brainstem	Cerebrum	Brainstem	Brainstem	Brainstem	Cerebrum	Cerebrum	Cerebrum	Cerebrum	Cerebrum	Cerebrum	Cerebrum	Cerebrum	Cerebrum	Cerebellum	Cerebellum	Brainstem	Brainstem	Cerebrum	Cerebellum	Cerebellum	Cerebrum	Brainstem	Cerebellum	Brainstem	Cerebellum	Cerebellum	Brainstem	Brainstem	Cerebrum
[truncated: 169 more columns]

## Sheet: Level6
SID	treatment	dose	sex	ACAd	ACAv	AD	AHNa	AHNc	AHNp	AId	AIp	AIv	AM	AMBd	AMBv	ANcr1gr	ANcr1mo	ANcr2gr	ANcr2mo	AOBgl	AOBgr	AOBmi	AON1	AONd	AONe	AONl	AONm	AONpv	AUDd	AUDp	AUDpo	AUDv	AV	BSTa	BSTp	CA	CEAc	CEAl	CEAm	CENT2gr	CENT2mo	CENT3gr	CENT3mo	CL	CM	CNlam	CNspg	COAa	COAp
25	107	RAD	M	160	327	98	31	112	75	54	255	55	231	0	0	126	80	219	87	1	2	0	44	3	2	4	6	7	1231	1366	68	1111	100	189	196	6044	482	147	1223	218	413	379	354	50	249	24	5	78	379
26	107	RAD	M	167	255	278	45	194	86	81	417	83	198	0	0	195	113	158	72	0	0	0	23	5	0	3	37	5	947	1828	53	1914	338	166	404	9000	1040	273	1468	364	686	585	556	147	152	21	19	93	438
28	107	RAD	M	97	263	389	34	80	36	31	125	36	215	0	1	247	102	315	152	0	0	1	8	1	0	0	2	1	522	896	49	818	304	181	287	6093	134	99	153	336	556	587	640	96	251	50	38	85	256
29	107	RAD	M	129	296	357	101	400	166	73	480	61	392	0	0	224	41	238	101	3	2	1	34	3	1	12	17	12	1166	1553	96	1459	511	232	298	21901	291	212	416	556	954	1193	843	275	373	27	13	202	346
30	107	RAD	M	65	263	264	50	147	82	25	179	25	235	7	0	372	132	470	153	0	0	0	3	0	0	1	22	5	502	797	33	819	458	174	224	5711	240	120	244	415	903	502	507	183	263	46	3	37	201
31	107	RAD	M	32	97	172	26	101	30	17	145	19	61	1	0	174	91	191	89	1	0	1	2	0	1	1	8	5	201	471	20	635	93	152	119	6017	325	157	431	237	722	478	408	99	136	22	11	58	793
32	107	RAD	M	175	329	290	36	219	79	66	157	67	157	0	0	302	84	212	94	0	0	0	5	0	17	10	7	10	713	1037	20	1022	424	157	288	4634	194	97	229	214	438	265	352	138	196	35	6	57	183
37	0	RAD	M	73	253	139	43	135	41	32	186	24	275	2	3	203	92	261	114	0	0	0	7	0	0	1	8	1	1021	1607	54	1252	424	103	422	6782	251	117	253	223	454	526	461	193	351	22	14	61	284
38	0	RAD	M	95	188	230	26	167	100	49	509	35	208	4	2	143	109	206	71	1	0	0	3	1	0	0	2	0	968	1827	108	2192	394	122	285	7022	367	101	381	344	822	682	758	185	223	30	43	71	262
39	0	RAD	M	69	179	266	60	109	56	15	153	25	271	7	2	532	198	461	135	1	0	0	4	0	0	0	7	5	1227	2015	82	2249	284	113	207	7532	183	134	268	446	581	905	741	186	118	61	33	50	456
40	0	RAD	M	17	63	12	4	19	14	5	78	2	11	1	1	186	70	87	25	0	0	0	0	0	0	0	0	0	210	440	19	478	27	6	38	3281	144	77	157	222	260	440	475	33	25	1	14	12	218
45	0	RAD	M	159	326	38	19	130	50	34	234	30	518	0	0	277	63	249	85	0	0	0	2	0	0	0	4	4	971	1085	59	988	74	128	278	7473	292	106	427	220	332	481	321	35	455	5	4	87	199
46	0	RAD	M	148	328	324	32	169	67	70	386	55	244	0	0	52	24	71	14	1	4	1	16	1	2	7	27	9	873	1312	45	1978	327	155	294	7822	349	127	481	203	383	277	335	189	236	24	4	125	417
47	0	RAD	M	79	158	115	4	35	16	39	120	29	37	0	3	79	47	63	29	0	0	0	5	0	1	0	5	7	221	512	26	689	93	79	95	3677	52	53	106	170	364	203	194	76	70	8	16	38	157
48	0	RAD	M	142	166	9	15	75	26	13	80	0	9	0	0	259	99	197	66	0	0	0	1	0	0	0	1	3	150	209	2	356	16	144	103	3105	63	34	87	57	199	315	284	6	17	11	9	19	122
73	107	SHAM	M	89	146	171	27	64	25	23	267	11	176	0	0	447	156	396	187	0	0	1	13	5	2	7	6	18	722	990	78	845	301	74	167	5476	269	118	249	285	251	605	630	141	167	58	15	28	371
74	107	SHAM	M	40	68	102	3	15	12	9	73	4	39	11	4	251	94	332	110	0	0	0	0	0	0	0	2	1	215	335	13	486	94	62	117	3811	158	70	208	385	485	508	487	31	9	8	8	116	205
76	107	SHAM	M	53	258	36	41	100	22	46	248	35	40	0	1	192	126	222	80	1	0	1	69	0	50	4	4	1	551	624	19	982	48	138	121	7016	279	106	302	422	608	626	517	29	114	31	17	59	413
77	107	SHAM	M	21	335	108	32	161	52	12	132	16	52	0	0	77	34	72	41	6	9	4	26	0	27	1	2	1	345	800	51	765	61	87	71	5300	280	75	242	468	656	800	703	98	76	33	29	39	250
78	107	SHAM	M	176	134	141	31	96	20	18	135	28	29	1	1	178	81	233	91	0	0	0	1	2	0	0	12	4	405	763	54	886	55	41	36	5067	273	181	375	278	486	781	1086	78	85	61	28	313	380
79	107	SHAM	M	42	198	225	15	165	108	26	154	37	241	2	1	146	65	187	75	0	0	0	1	0	0	0	12	5	364	883	51	797	452	118	185	6090	123	84	163	371	562	585	528	161	167	47	34	117	499
80	107	SHAM	M	32	155	149	18	121	51	39	74	35	102	3	0	261	73	318	183	0	0	0	49	0	18	0	10	5	328	559	26	737	200	92	172	5002	155	82	203	227	578	571	530	85	156	37	35	45	215
85	0	SHAM	M	122	333	245	8	35	24	23	220	20	187	0	0	490	169	403	152	0	0	0	8	0	0	0	5	32	797	1160	60	1424	296	63	90	5123	254	176	315	193	445	446	416	162	210	46	21	92	288
86	0	SHAM	M	109	429	264	47	185	52	55	237	40	273	21	2	247	114	205	91	0	0	0	8	3	1	0	10	6	761	770	52	615	289	217	365	5947	167	125	154	261	508	322	432	63	335	26	18	72	292
87	0	SHAM	M	67	253	60	40	163	61	28	94	45	33	20	8	296	169	362	155	0	0	0	16	1	4	1	11	3	920	1026	48	749	46	121	91	5400	104	64	133	505	577	664	641	32	124	47	24	82	190
88	0	SHAM	M	134	234	268	73	220	66	58	163	62	315	1	19	228	80	244	69	5	6	0	22	4	12	7	17	8	538	712	55	684	357	203	386	10576	523	380	848	366	577	317	343	91	287	29	7	113	344
93	0	SHAM	M	33	125	222	77	234	63	26	149	40	231	0	1	234	82	265	84	0	0	0	5	0	1	2	17	5	378	688	48	652	366	132	300	5762	962	136	995	294	579	534	458	179	202	3	4	112	505
94	0	SHAM	M	153	343	224	23	174	90	57	228	41	188	0	0	179	108	199	50	0	0	0	58	3	2	5	23	0	429	766	34	769	286	192	361	7191	371	176	507	126	285	321	418	130	207	25	6	157	439
95	0	SHAM	M	172	357	100	47	99	16	26	155	39	109	0	0	93	58	112	63	0	0	0	4	0	0	0	15	5	664	645	23	595	167	166	349	5570	279	137	376	319	539	563	655	91	221	32	30	68	587
96	0	SHAM	M	75	223	104	29	116	26	32	157	22	130	0	0	60	42	107	52	1	0	0	17	0	1	2	3	1	298	562	34	817	213	105	269	5178	461	106	499	150	386	351	414	125	147	14	12	289	294
Full Name				anterior cingulate area, dorsal part	anterior cingulate area, ventral part	anterodorsal nucleus	anterior hypothalamic nucleus, anterior part	anterior hypothalamic nucleus, central part	anterior hypothalamic nucleus, posterior part	agranular insular area, dorsal part	agranular insular area, posterior part	agranular insular area, ventral part	anteromedial nucleus	nucleus ambiguus, dorsal division	nucleus ambiguus, ventral division	crus 1, granular layer	crus 1, molecular layer	crus 2, granular layer	crus 2, molecular layer	accessory olfactory bulb, glomerular layer	accessory olfactory bulb, granule layer	accessory olfactory bulb, mitral layer	anterior olfactory nucleus layer 1	anterior olfactory nucleus, dorsal part	anterior olfactory nucleus, external part	anterior olfactory nucleus, lateral part	anterior olfactory nucleus, medial part	anterior olfactory nucleus, posteroventral part	dorsal auditory area	primary auditory area	posterior auditory area	ventral auditory area	anteroventral nucleus of the thalamus	bed nuclei of the stria terminalis, anterior division	bed nuclei of the stria terminalis, posterior division	ammon's horn	central amygdalar nucleus, capsular part	central amygdalar nucleus, lateral part	central amygdalar nucleus, medial part	lovule II, granular layer	lovule II, molecular layer	lovule II, granular layer	lovule II, molecular layer	central lateral nucleus of the thalamus	central medial nucleus of the thalamus	granular lamina of the cochlear nuclei	cochlear nucleus, subpendunclular granular region	cortical amygdalar area, anterior part	cortical amygdalar area, posterior part
Level				6	6	6	6	6	6	6	6	6	6	6	6	6	6	6	6	6	6	6	6	6	6	6	6	6	6	6	6	6	6	6	6	6	6	6	6	6	6	6	6	6	6	6	6	6	6
Family(level1)				Cerebrum	Cerebrum	Brainstem	Brainstem	Brainstem	Brainstem	Cerebrum	Cerebrum	Cerebrum	Brainstem	Brainstem	Brainstem	Cerebellum	Cerebellum	Cerebellum	Cerebellum	Cerebrum	Cerebrum	Cerebrum	Cerebrum	Cerebrum	Cerebrum	Cerebrum	Cerebrum	Cerebrum	Cerebrum	Cerebrum	Cerebrum	Cerebrum	Brainstem	Cerebrum	Cerebrum	Cerebrum	Cerebrum	Cerebrum	Cerebrum	Cerebellum	Cerebellum	Cerebellum	Cerebellum	Brainstem	Brainstem	Brainstem	Brainstem	Cerebrum	Cerebrum
[truncated: 198 more columns]

## Sheet: Level7
SID	treatment	dose	sex	ACAd1	ACAd2/3	ACAd5	ACAd6a	ACAd6b	ACAv1	ACAv2/3	ACAv5	ACAv6a	ACAv6b	AId1	AId2/3	AId5	AId6a	AId6b	AIp1	AIp2/3	AIp5	AIp6a	AIv1	AIv2/3	AIv5	AIv6a	AIv6b	AMd	AMv	AUDd1	AUDd2/3	AUDd4	AUDd5	AUDd6a	AUDd6b	AUDp1	AUDp2/3	AUDp4	AUDp5	AUDp6a	AUDp6b	AUDpo1	AUDpo2/3	AUDpo4	AUDpo5	AUDpo6a	AUDpo6b	AUDv1	AUDv2/3
25	107	RAD	M	4	54	66	33	3	117	109	63	35	3	1	15	24	12	2	7	72	87	89	4	21	20	10	0	183	48	2	162	153	452	329	133	2	208	237	523	284	112	1	18	10	31	7	1	7	181
26	107	RAD	M	4	41	83	38	1	33	115	77	28	2	2	16	29	28	6	27	102	156	132	5	34	29	15	0	176	22	2	165	133	340	203	104	4	286	343	670	387	138	0	8	5	24	12	4	25	321
28	107	RAD	M	10	26	36	20	5	132	52	61	15	3	1	9	8	13	0	7	36	34	48	0	18	13	5	0	196	19	1	84	70	192	127	48	0	112	135	380	209	60	0	4	5	22	12	6	1	114
29	107	RAD	M	32	61	21	11	4	178	67	33	16	2	10	8	29	19	7	17	112	164	187	0	21	21	19	0	370	22	0	212	170	388	284	112	1	239	331	573	304	105	0	17	11	48	16	4	8	231
30	107	RAD	M	7	12	31	13	2	159	51	27	24	2	1	4	10	9	1	11	47	57	64	0	5	17	3	0	218	17	0	51	74	192	143	42	0	106	149	285	197	60	0	4	4	12	9	4	3	130
31	107	RAD	M	8	5	12	4	3	57	13	18	7	2	0	6	4	7	0	8	31	56	50	0	6	10	3	0	49	12	0	19	16	86	50	30	3	76	74	186	98	34	0	2	1	11	4	2	5	107
32	107	RAD	M	106	35	20	14	0	264	26	24	11	4	0	16	28	18	4	11	37	38	71	2	16	36	13	0	138	19	2	108	120	276	147	60	1	145	190	413	242	46	0	2	0	12	5	1	6	165
37	0	RAD	M	29	12	26	4	2	177	47	21	7	1	1	4	17	10	0	11	41	58	76	0	4	15	5	0	246	29	1	112	153	365	279	111	2	217	389	546	299	154	0	10	6	27	6	5	8	164
38	0	RAD	M	16	51	11	13	4	61	66	48	12	1	1	8	25	13	2	34	136	185	154	0	13	13	9	0	191	17	2	216	148	324	209	69	2	370	377	622	309	147	0	23	15	56	11	3	31	409
39	0	RAD	M	29	32	6	2	0	117	42	14	6	0	3	3	4	5	0	7	22	47	77	0	9	10	6	0	236	35	3	174	148	496	317	89	7	259	338	931	384	96	0	18	12	29	19	4	9	295
40	0	RAD	M	6	6	5	0	0	32	29	2	0	0	0	0	1	4	0	3	13	34	28	0	0	0	2	0	10	1	0	27	18	78	71	16	4	68	37	160	118	53	0	0	1	13	5	0	10	127
45	0	RAD	M	75	29	21	29	5	161	87	47	22	9	1	4	15	14	0	5	44	84	101	0	8	17	5	0	340	178	1	108	118	365	237	142	0	159	158	385	259	124	0	9	10	20	14	6	2	119
46	0	RAD	M	22	97	15	11	3	199	89	26	11	3	0	17	31	20	2	43	107	104	132	2	22	24	7	0	226	18	0	106	125	363	167	112	10	155	254	448	289	156	0	3	2	32	6	2	202	158
47	0	RAD	M	31	26	15	6	1	113	26	15	3	1	2	10	12	14	1	5	22	45	48	1	14	9	5	0	25	12	0	28	19	78	56	40	1	51	62	223	133	42	0	3	0	14	6	3	3	42
48	0	RAD	M	42	72	21	5	2	106	47	12	1	0	5	5	1	2	0	6	16	17	41	0	0	0	0	0	6	3	1	20	18	52	43	16	3	37	29	85	36	19	0	0	0	1	1	0	4	47
73	107	SHAM	M	35	19	29	4	2	66	51	26	2	1	0	3	10	9	1	7	72	89	99	0	5	5	1	0	157	19	2	156	88	284	157	35	0	135	179	422	206	48	0	11	7	31	19	10	6	152
74	107	SHAM	M	11	22	2	5	0	40	17	4	7	0	0	0	3	5	1	4	10	26	33	1	0	1	2	0	34	5	1	23	15	91	65	20	1	46	39	168	59	22	0	1	0	7	4	1	8	51
76	107	SHAM	M	6	6	23	13	5	153	64	27	11	3	2	4	15	20	5	8	43	96	101	1	4	24	6	0	26	14	0	74	68	229	126	54	2	98	82	216	136	90	0	3	2	10	4	0	6	81
77	107	SHAM	M	6	5	6	4	0	224	71	29	9	2	0	2	1	6	3	13	19	45	55	0	4	10	2	0	45	7	0	65	53	107	95	25	0	123	143	354	134	46	0	3	6	27	13	2	6	137
78	107	SHAM	M	27	134	9	4	2	73	54	3	4	0	1	4	6	7	0	6	36	42	51	3	6	15	4	0	13	16	1	57	51	174	97	25	0	121	140	339	138	25	0	13	10	20	8	3	6	141
79	107	SHAM	M	11	2	10	16	3	120	39	21	14	4	1	6	8	10	1	4	34	47	69	0	16	18	3	0	223	18	2	74	49	145	72	22	2	199	143	371	137	31	0	13	2	21	9	6	16	168
80	107	SHAM	M	5	9	10	7	1	87	51	11	5	1	8	10	8	12	1	6	7	30	31	10	7	6	12	0	94	8	1	24	25	111	112	55	0	50	62	224	142	81	0	2	2	12	7	3	3	103
85	0	SHAM	M	34	28	41	19	0	200	72	41	18	2	0	3	13	6	1	7	58	84	71	1	5	9	5	0	162	25	3	198	92	263	168	73	3	209	187	416	276	69	0	9	1	26	20	4	14	251
86	0	SHAM	M	30	15	44	18	2	313	57	40	19	0	0	8	20	25	2	16	33	87	101	2	11	22	5	0	247	26	5	236	63	262	155	40	1	211	88	234	175	61	1	24	4	16	5	2	0	73
87	0	SHAM	M	33	8	17	7	2	182	37	24	9	1	1	6	13	7	1	8	20	31	35	5	20	15	5	0	28	5	10	248	115	308	161	78	2	154	121	423	245	81	0	7	2	31	7	1	6	109
88	0	SHAM	M	49	41	29	12	3	137	46	34	14	3	5	23	19	10	1	25	47	45	46	6	22	27	7	0	292	23	1	114	59	108	110	146	3	131	116	253	126	83	0	21	5	23	6	0	21	174
93	0	SHAM	M	11	11	6	5	0	86	21	16	1	1	1	0	15	10	0	9	28	54	58	0	4	26	10	0	221	10	2	97	61	120	64	34	2	113	106	313	119	35	1	14	2	16	12	3	10	92
94	0	SHAM	M	70	37	29	14	3	253	58	23	7	2	11	19	16	8	3	15	49	82	82	1	9	21	10	0	165	23	4	174	85	106	47	13	1	145	116	379	101	24	0	5	2	20	5	2	7	119
95	0	SHAM	M	65	70	24	11	2	254	71	21	11	0	0	2	11	11	2	6	31	60	58	2	7	22	8	0	92	17	1	100	101	237	148	77	1	60	71	300	133	80	0	4	4	10	3	2	3	71
96	0	SHAM	M	27	15	18	13	2	144	47	24	6	2	2	5	18	6	1	9	29	56	63	0	2	18	2	0	119	11	1	40	35	93	90	39	4	91	84	223	118	42	0	10	6	13	3	2	11	151
Full Name				anterior cingulate area dorsal part layer 1	anterior cingulate area, dorsal part layer 2/3	anterior cingulate area, dorsal part layer 5	anterior cingulate area, dorsal part layer 6a	anterior cingulate area, dorsal part layer 6b	anterior cingulate area ventral part layer 1	anterior cingulate area ventral part layer 2/3	anterior cingulate area ventral part layer 5	anterior cingulate area ventral part layer 6a	anterior cingulate area ventral part layer 6b	agranular insular area dorsal party layer 1	agranular insular area dorsal party layer 2/3	agranular insular area dorsal party layer 5	agranular insular area dorsal party layer 6a	agranular insular area dorsal party layer 6b	agranular insular area posterior part layer 1	agranular insular area posterior part layer 2/3	agranular insular area posterior part layer 5	agranular insular area posterior part layer 6a	agranular insular area ventral part layer 1	agranular insular area ventral part layer 2/3	agranular insular area ventral part layer 5	agranular insular area ventral part layer 6a	agranular insular area ventral part layer 6b	anteromedial nucleus, dorsal part	anteromedial nucleus, ventral part	dorsal auditory area layer 1	dorsal auditory area layer 2/3	dorsal auditory area layer 4	dorsal auditory area layer 5	dorsal auditory area layer 6a	dorsal auditory area layer 6b	primary auditory area layer 1	primary auditory area layer 2/3	primary auditory area layer 4	primary auditory area layer 5	primary auditory area layer 6a	primary auditory area layer 6b	posterior auditory area layer 1	posterior auditory area layer 2/3	posterior auditory area layer 4	posterior auditory area layer 5	posterior auditory area layer 6a	posterior auditory area layer 6b	ventral auditory area layer 1	ventral auditory area layer 2/3
Level				7	7	7	7	7	7	7	7	7	7	7	7	7	7	7	7	7	7	7	7	7	7	7	7	7	7	7	7	7	7	7	7	7	7	7	7	7	7	7	7	7	7	7	7	7	7
Family(level1)				Cerebrum	Cerebrum	Cerebrum	Cerebrum	Cerebrum	Cerebrum	Cerebrum	Cerebrum	Cerebrum	Cerebrum	Cerebrum	Cerebrum	Cerebrum	Cerebrum	Cerebrum	Cerebrum	Cerebrum	Cerebrum	Cerebrum	Cerebrum	Cerebrum	Cerebrum	Cerebrum	Cerebrum	Brainstem	Brainstem	Cerebrum	Cerebrum	Cerebrum	Cerebrum	Cerebrum	Cerebrum	Cerebrum	Cerebrum	Cerebrum	Cerebrum	Cerebrum	Cerebrum	Cerebrum	Cerebrum	Cerebrum	Cerebrum	Cerebrum	Cerebrum	Cerebrum	Cerebrum
[truncated: 172 more columns]

## Sheet: Level8
SID	treatment	dose	sex	CA1slm	CA1so	CA1sp	CA1sr	CA2slm	CA2so	CA2sp	CA2sr	CA3slm	CA3so	CA3sp	CA3sr	COApl1	COApl2	COApl3	COApm1	COApm2	COApm3	ENTl1	ENTl2	ENTl2/3	ENTl2a	ENTl2b	ENTl3	ENTl4	ENTl4/5	ENTl5	ENTl6a	ENTl6b	ENTm1	ENTm2	ENTm2a	ENTm2b	ENTm3	ENTm4	ENTm5	ENTm6	ENTmv1	ENTmv2	ENTmv3	ENTmv5/6	PVHpml	PVHpmm	SSp-bfd1	SSp-bfd2/3	SSp-bfd4
25	107	RAD	M	989	583	661	688	33	54	55	68	14	1353	999	417	3	44	137	1	22	172	133	46	91	357	613	1009	420	127	1016	1104	113	97	654	13	32	644	73	179	271	16	47	40	0	32	1	7	510	382
26	107	RAD	M	1765	947	683	1052	73	85	53	99	16	2247	1289	511	12	60	141	8	27	190	220	49	120	450	636	980	433	246	1182	1013	166	74	582	4	10	582	69	218	388	4	28	13	1	17	8	10	757	491
28	107	RAD	M	1385	544	602	926	69	73	40	101	25	1182	595	448	6	35	78	6	31	100	78	24	106	281	485	744	283	184	874	933	187	64	479	3	12	648	52	118	155	18	42	16	0	33	9	0	419	339
29	107	RAD	M	4865	1981	1536	5422	336	303	154	544	155	2782	1850	1722	5	78	79	0	21	163	113	62	92	402	717	1157	423	208	1294	1196	163	76	651	4	14	591	77	213	379	8	31	12	2	13	3	4	450	377
30	107	RAD	M	1166	493	672	907	50	55	46	91	12	1106	648	367	22	43	35	0	11	90	86	28	55	250	467	749	325	122	872	957	127	27	349	4	26	620	49	169	326	3	11	7	0	42	2	5	330	203
31	107	RAD	M	1087	474	540	719	54	50	39	79	16	1411	907	491	6	49	237	7	66	428	90	36	82	212	437	705	291	201	853	1038	238	74	370	2	7	484	67	180	261	4	15	10	1	18	1	0	134	124
32	107	RAD	M	778	382	557	582	43	97	70	77	8	1000	693	273	4	22	56	3	14	84	43	31	60	215	379	623	252	157	719	802	116	37	235	7	5	303	29	100	147	7	39	21	2	60	10	3	233	191
37	0	RAD	M	1414	596	668	1093	84	80	75	109	26	1213	864	456	6	45	73	3	18	139	79	30	62	244	375	630	267	227	859	926	168	36	310	8	10	375	41	115	251	5	31	11	1	11	2	9	264	189
38	0	RAD	M	1455	592	622	907	72	51	50	84	28	1558	860	609	12	28	72	2	11	137	173	52	109	316	536	868	351	314	931	965	162	24	296	1	4	348	39	109	303	3	24	10	0	53	7	9	847	484
39	0	RAD	M	1645	525	831	961	63	60	47	94	9	1446	961	700	3	48	150	8	48	199	58	25	107	357	843	1505	653	279	1604	1850	216	87	763	8	10	1212	57	212	473	8	64	28	2	26	4	5	369	361
40	0	RAD	M	771	227	325	531	15	9	21	20	3	630	395	278	32	30	75	5	25	51	87	16	49	205	341	444	225	127	683	639	150	30	227	2	6	214	34	89	179	4	31	8	0	2	0	1	28	18
45	0	RAD	M	1306	781	750	853	71	69	60	78	14	1728	1085	510	1	25	68	6	6	93	50	21	75	233	507	786	313	197	906	1042	182	37	432	5	18	444	73	145	234	1	9	28	0	18	0	9	328	253
46	0	RAD	M	1576	888	802	1087	56	78	76	112	15	1605	936	463	4	64	151	1	34	163	106	25	104	315	545	798	339	203	983	934	178	47	343	5	8	396	52	132	335	9	25	11	0	18	1	3	553	411
47	0	RAD	M	935	337	296	556	39	60	52	62	17	725	264	294	23	8	37	19	25	45	37	9	34	76	182	360	148	81	464	626	62	73	140	0	0	164	19	67	158	14	6	6	0	11	2	2	107	58
48	0	RAD	M	469	133	220	398	25	19	33	26	2	1140	395	182	7	18	31	6	16	44	33	9	40	72	138	216	85	70	247	193	51	37	139	0	0	81	6	25	33	6	11	2	0	8	3	5	80	72
73	107	SHAM	M	1155	483	528	867	49	57	53	83	10	1067	614	408	3	42	111	8	45	162	78	16	71	303	559	898	389	251	1107	1041	150	82	569	6	9	673	61	179	370	12	35	19	2	16	2	10	476	233
74	107	SHAM	M	995	261	247	692	48	17	28	51	17	843	371	211	12	31	65	5	14	78	43	6	34	105	222	446	216	84	495	561	102	29	230	2	3	244	36	56	81	3	22	6	1	9	0	1	125	74
76	107	SHAM	M	1318	584	596	1015	63	63	42	70	7	1829	787	523	3	36	140	2	24	208	67	23	96	141	351	705	348	226	896	1169	246	22	241	4	8	378	46	109	237	10	44	26	1	4	3	3	252	196
77	107	SHAM	M	1248	567	471	910	58	38	41	83	11	951	498	338	18	38	63	3	4	124	31	17	52	116	201	409	181	154	629	747	130	34	253	0	5	377	50	129	322	1	28	14	0	10	0	1	133	97
78	107	SHAM	M	1259	480	454	727	55	31	37	57	8	994	530	369	44	80	81	4	24	147	92	34	59	440	609	851	338	161	824	714	179	61	342	12	6	344	55	143	259	6	33	22	0	3	1	1	115	105
79	107	SHAM	M	1508	595	658	1049	64	73	49	110	26	868	602	393	6	72	117	6	75	223	130	36	70	373	743	1122	493	135	1220	1109	132	33	483	3	10	663	75	213	416	15	42	18	2	45	5	8	281	186
80	107	SHAM	M	970	638	431	668	23	61	38	48	9	1160	583	308	2	15	80	2	9	107	81	27	68	195	412	709	275	171	800	1010	203	33	186	1	5	299	52	129	220	4	40	22	0	4	4	11	246	196
85	0	SHAM	M	961	560	650	650	40	80	43	67	6	913	709	352	16	49	71	6	29	117	89	34	115	271	509	837	371	241	926	1190	196	39	322	6	14	471	49	130	275	9	50	40	1	9	0	14	514	333
86	0	SHAM	M	859	543	727	607	45	58	33	55	28	1481	867	498	9	29	69	11	48	126	109	26	42	249	420	618	281	197	845	1021	201	40	376	6	11	431	43	164	225	11	35	26	1	23	5	11	493	287
87	0	SHAM	M	852	531	692	733	58	73	42	56	12	1077	816	346	8	52	55	0	6	69	81	22	46	247	434	709	278	89	882	1052	159	53	574	3	6	656	75	177	358	4	22	8	0	11	0	7	607	359
88	0	SHAM	M	955	610	1148	833	131	204	117	158	67	3151	2160	770	7	53	111	1	32	140	87	30	26	248	478	743	356	89	846	1012	112	26	365	6	16	499	61	127	211	6	25	9	1	12	1	8	485	333
93	0	SHAM	M	1029	495	557	732	37	44	51	81	8	1351	861	372	18	116	159	5	34	173	77	27	64	342	519	769	356	186	1044	1175	157	35	406	5	21	461	55	173	307	7	31	22	1	10	1	3	202	195
94	0	SHAM	M	1249	480	422	678	50	61	51	72	24	1904	1303	616	11	59	103	10	43	213	179	40	66	346	453	553	222	184	618	780	169	53	353	18	25	379	55	160	248	27	63	37	1	48	13	5	375	211
95	0	SHAM	M	972	559	483	687	34	34	28	39	6	1312	838	443	8	66	181	11	86	235	113	23	53	342	470	644	293	185	893	867	236	71	486	8	13	343	62	166	265	22	38	18	0	15	0	2	161	108
96	0	SHAM	M	901	557	562	692	41	67	25	58	10	1090	669	396	2	24	77	5	27	159	60	16	56	181	327	521	241	128	617	795	118	27	306	2	16	336	58	136	282	7	34	26	3	4	2	2	88	98
Full Name				field ca1, stratum lacunosum-moleculare	Field CA1, stratum oriens	field Cai, pyramidal layer	field CA1, stratum radiatum	field ca2, stratum lacunosum-moleculare	Field CA2, stratum oriens	field Ca2, pyramidal layer	field CA2, stratum radiatum	field ca3, stratum lacunosum-moleculare	Field CA3, stratum oriens	field Ca3, pyramidal layer	field CA3, stratum radiatum	cortical amygdalar area, posterior part, lateral zone layer 1	cortical amygdalar area, posterior part, lateral zone layer 2	cortical amygdala area, posterior part, lateral zone layer 3	cortical amygdalar area, posterior part, medial zone layer 1	cortical amygdalar area, posterior part, medial zone layer 2	cortical amygdalar area, posterior part, medial zone layer 3	entorhinal area, lateral part layer 1	entorhinal area, lateral part layer 2	entorhinal area, lateral part layer 2/3	entorhinal area, lateral part layer 2a	entorhinal area, lateral part layer 2b	entorhinal area, lateral part layer 3	entorhinal area, lateral part layer 4	entorhinal area, lateral part layer 4/5	entorhinal area, lateral part layer 5	entorhinal area, lateral part layer 6a	entorhinal area, lateral part layer 6b	entorhinal area, medial part, dorsal zone layer 1	entorhinal area, medial part, dorsal zone layer 2	entorhinal area, medial part, dorsal zone layer 2a	entorhinal area, medial part, dorsal zone layer 2b	entorhinal area, medial part, dorsal zone layer 3	entorhinal area, medial part, dorsal zone layer 4	entorhinal area, medial part, dorsal zone layer 5	entorhinal area, medial part, dorsal zone layer 5	entorhinal area, medial part, ventral zone layer 1	entorhinal area, medial part, ventral zone layer 2	entorhinal area, medial part, ventral zone layer 3	entorhinal area, medial part, ventral zone layer 5/6	paraventricular hypothalamic nucleus, magnocellular division, posterior magnocellular part, lateral zone	paraventricular hypothalamic nucleus, magnocellular division, posterior magnocellular part, medial zone	primary somatosensory area, barrel field layer 1	primary somatosensory area, barrel field layer 2/3	primary somatosensory area, barrel field layer 4
Level				8	8	8	8	8	8	8	8	8	8	8	8	8	8	8	8	8	8	8	8	8	8	8	8	8	8	8	8	8	8	8	8	8	8	8	8	8	8	8	8	8	8	8	8	8	8
Family(level1)				Cerebrum	Cerebrum	Cerebrum	Cerebrum	Cerebrum	Cerebrum	Cerebrum	Cerebrum	Cerebrum	Cerebrum	Cerebrum	Cerebrum	Cerebrum	Cerebrum	Cerebrum	Cerebrum	Cerebrum	Cerebrum	Cerebrum	Cerebrum	Cerebrum	Cerebrum	Cerebrum	Cerebrum	Cerebrum	Cerebrum	Cerebrum	Cerebrum	Cerebrum	Cerebrum	Cerebrum	Cerebrum	Cerebrum	Cerebrum	Cerebrum	Cerebrum	Cerebrum	Cerebrum	Cerebrum	Cerebrum	Cerebrum	Brainstem	Brainstem	Cerebrum	Cerebrum	Cerebrum
[truncated: 39 more columns]

## Sheet: NORCircuitry-master
SID	treatment	dose	sex	BLA	BMA	LA	OLF	CEA	ECT	HIP	MEA	MO	PERI	SH	SS	TEa	VIS	ENT	PAR	POST	PRE	SUB
25	107	RAD	M	791	559	283	4163	1852	2289	10166	2116	849	1002	27	4701	1797	4577	7095	860	628	1449	4113
26	107	RAD	M	1419	972	685	4880	2781	2988	15368	1254	1045	1368	11	6965	2503	3487	7468	980	1134	2151	4431
28	107	RAD	M	746	301	536	3051	386	2744	10466	952	355	989	1	3829	1897	3951	5786	703	602	1267	3645
29	107	RAD	M	1185	801	409	5834	919	3284	30905	2317	548	1182	7	5076	2570	4896	7885	1414	936	2462	7367
30	107	RAD	M	917	358	546	2253	604	2009	10401	1076	494	885	9	3183	1576	3489	5629	719	708	1661	3755
31	107	RAD	M	1015	683	507	3219	913	1544	11392	1798	254	986	6	2328	1071	1237	5658	804	523	1616	3447
32	107	RAD	M	811	234	344	3272	520	2178	7856	1318	534	1014	4	3342	1726	2952	4329	458	367	726	2820
37	0	RAD	M	1086	362	586	3009	621	1866	11479	1593	280	919	3	2696	1792	5271	5061	744	755	1454	4014
38	0	RAD	M	883	398	582	2936	849	3193	12552	1930	449	1489	8	5554	2851	6314	5938	714	725	1589	3994
39	0	RAD	M	1034	557	652	3201	585	6234	15786	1814	214	1698	0	4428	4424	14153	10421	1008	1312	2472	5779
40	0	RAD	M	494	257	285	1015	378	1113	6322	799	10	653	0	423	766	518	3790	672	312	1136	2476
45	0	RAD	M	875	423	419	2440	825	3013	12646	1527	829	1167	11	4078	2072	6897	5738	1055	694	1815	4128
46	0	RAD	M	1049	746	588	5300	957	2770	13277	2137	511	1274	3	5105	2827	5734	5893	943	714	1678	3975
47	0	RAD	M	217	139	205	1079	211	1752	6842	240	211	579	6	1329	1390	5062	2726	364	413	887	2011
48	0	RAD	M	345	200	165	1218	184	657	5118	497	120	401	5	1257	491	895	1494	59	257	301	794
73	107	SHAM	M	982	406	487	2790	636	2592	10173	1218	281	1047	0	3188	2084	6221	6880	1016	688	1636	3782
74	107	SHAM	M	439	205	397	1088	436	857	6625	1055	84	520	0	1287	902	1162	3027	336	298	876	1980
76	107	SHAM	M	845	628	491	2802	687	1970	11982	1925	520	1139	1	3808	1583	3352	5394	781	649	1703	4054
77	107	SHAM	M	599	465	429	1480	597	2109	10275	935	146	756	3	1698	1638	3960	3880	740	488	1469	3037
78	107	SHAM	M	907	488	411	3064	829	1999	11285	1929	83	1057	2	1182	1753	3371	5584	470	1155	1981	3865
79	107	SHAM	M	839	392	415	3105	370	3039	11385	1504	243	1059	3	2201	2106	4647	7536	756	807	1645	4826
80	107	SHAM	M	567	392	378	1933	440	1797	9212	1189	217	933	1	2292	1298	2072	4942	403	527	1297	3233
85	0	SHAM	M	926	417	666	2642	745	3164	9034	1152	507	1494	5	4356	2251	5004	6185	586	503	1262	3409
86	0	SHAM	M	917	430	658	3057	446	2240	10506	1277	589	1123	3	4270	1358	3561	5378	1076	692	1636	3971
87	0	SHAM	M	666	442	371	2317	301	2829	9254	1142	342	889	5	3604	1610	4801	5935	1231	704	2071	4428
88	0	SHAM	M	1164	721	632	4139	1751	1771	15137	1264	569	661	7	4259	1311	3031	5379	762	413	1225	3460
93	0	SHAM	M	680	627	472	3765	2093	2228	11306	2302	203	1006	7	2666	1471	2892	6240	882	625	1519	3832
94	0	SHAM	M	794	387	491	5333	1054	1593	13677	2469	420	925	9	2920	1395	2524	5029	568	659	1237	3897
95	0	SHAM	M	928	536	496	3392	792	1373	9883	2008	268	952	5	2044	1041	1486	5611	1005	648	1393	3605
96	0	SHAM	M	701	464	302	2666	1066	1623	9684	1720	309	686	3	2630	1374	2256	4293	786	471	1218	3781
Full Name				basolateral amygdalar nucleus	basomedial amygdalar nucleus	lateral amygdalar nucleus	olfactory areas	central amygdalar nucleus	ectorhinal area	hippocampal region	medial amygdalar nucleus	somatomotor areas	perirhinal area	septohippocampal nucleus	somatosensory areas	temporal association areas	visual areas	entorhinal area	parasubiculum	postsubiculum	presubiculum	subiculum
Level				4	4	4	4	5	5	5	5	5	5	5	5	5	5	6	6	6	6	6
Family(level1)				Cerebrum	Cerebrum	Cerebrum	Cerebrum	Cerebrum	Cerebrum	Cerebrum	Cerebrum	Cerebrum	Cerebrum	Cerebrum	Cerebrum	Cerebrum	Cerebrum	Cerebrum	Cerebrum	Cerebrum	Cerebrum	Cerebrum

[truncated: 1 more sheets: HipCircuitry-master]
